# Supplementary material for: Providing Undergraduate Science Partners for Elementary Teachers: Benefits and Challenges
Source: Atypon-hosted journal article supplement (doi:10.1187/cbe.08-07-0041), 2009-09-01
Supplement: suppmatt.pdf [file suppmatt.pdf]

## **Supplemental Materials**

### **SM-1 Science Partner Interview Protocol**

Week 23, Interview questions

1. Why did you decide to become a partner?
2. What were your expectations?
3. What typically happens during science time?
4. How would you describe the relationship you have with your students?
5. What skills and sensibilities does your role as a science partner require?
6. What evidence do you have that your students are learning science?
7. How has that knowledge affected your understanding of them as learners?
8. How have the students' attitudes toward science and learning changed as a result of the partnership?
9. How did ESEP influence their actions/behavior related to learning science?
10. How have you most profoundly changed after being involved in ESEP (as a result of the experience)?
11. How has your experience in the ESEP program affected your understanding of science?

SM-2. Summary of science partners' beliefs about pupils' ability to learn science as expressed during each time period

| Participant | Initial Belief                                                   | Week 4                                                                                                                                    | Week 11                                                                                                                        | Week 20                                                                                                                             | Week 23                                                                                                                                                                              |
|-------------|------------------------------------------------------------------|-------------------------------------------------------------------------------------------------------------------------------------------|--------------------------------------------------------------------------------------------------------------------------------|-------------------------------------------------------------------------------------------------------------------------------------|--------------------------------------------------------------------------------------------------------------------------------------------------------------------------------------|
| Anna        | Expect students are unintelligent, misbehaved & disinterested    | Most below average in "innate" skills; are uncreative; Few have ability to learn science; Most low interest in science & other subjects   | Some intelligent; Most uncreative but skill can be developed; Most enjoy science but unmotivated to learn                      | Some able but unmotivated; Students have various abilities & learning styles                                                        | Most intelligent & able; Students have various abilities; Most interested & motivated to learn science, but not other subjects; Most learned science                                 |
| Badra       |                                                                  | Most able but slow (poor memory) in learning science; Most have low interest & low motivation                                             | Most able but slow (poor memory) in learning science; Most are interested & motivated                                          | Students able to learn science & any subjects; Students have "vivid" memories; Most are interested & motivated                      | Students able to learn science; Students are typical learners for their age; Students have "vivid" memories; Most interested & motivated; Students learned science                   |
| Chikara     |                                                                  | Some able but slow (poor memory) in learning science; Some smarter & more able; Most low interest; most mentally disconnected & excitable | Some able but slow (poor memory); Some respond to experience w/science; Science practice stimulated their interest in learning | "All" able to learn science; Some smarter & more able; Most interested in learning; Most motivated by experience w/science practice | "All" able to learn science; Some smarter & more able; Most interested in learning; "All" respond positively to experience w/science practice                                        |
| Dawei       | Most probably not intelligent; most below grade level in ability | Some able but slow learners; Some only learn methods; Most interested in learning; Most need 1-on-1 w/teacher                             | Most able; Students have different learning & communication styles; Most interested in learning; Most need 1-on-1 w/teacher    | "All" able; "All" intelligent; "All" need logic training; Most interested in learning; Some students prefer 1-on-1 w/teacher        | "All" able & more so than most students at their grade level; "All" intelligent; Most interested in learning; "All" learned science yet are under prepared for middle school studies |
